# 1 Investigation of Thyroid Hormone Associated Gene- 2 Regulatory Networks during Hepatogenesis using an 3 Induced Pluripotent Stem Cell based Model

4 Audrey Ncube<sup>§</sup>, Nina Graffmann<sup>§</sup>, Jan Greulich, Bo Scherer, Wasco Wruck and James Adjaye\*

5 Institute for Stem Cell Research and Regenerative Medicine, Medical Faculty, Heinrich Heine University,  
6 40225 Düsseldorf, Germany

7 <sup>§</sup> Equal Contribution

8 \* Correspondence: james.adjaye@med.uni-duesseldorf.de, Phone: 0049 211 8108191

9 **Abstract:** Currently, the only treatment of end-stage liver diseases is liver transplantation. The  
10 worldwide shortage of donor organs and the high number of patients suffering from end-stage liver  
11 diseases, require alternative treatment approaches. Therefore, the generation of hepatocyte-like cells  
12 (HLCs) derived from induced pluripotent stem cells (iPSCs) is a promising treatment option. HLCs  
13 are suitable for patient-specific drug screening, disease modeling and regenerative medicine. So far,  
14 they are immature and resemble the fetal state. In this study, we employed the combined thyroid  
15 hormones triiodo-L-thyronine (T3) and L-thyroxine (T4) to drive HLCs towards maturation. HLCs  
16 expressed the maturation markers ALBUMIN (ALB), ALPHA-1 ANTITRYPSIN (A1AT),  
17 CYTOCHROME P450 3A4 (CYP3A4) and TRANSTHYRETIN (TTR). Remarkably, stimulation with  
18 T3 and T4 slightly reduced the expression of the fetal marker CYTOCHROME P450 3A7 (CYP3A7)  
19 and had an even more pronounced effect on ALPHA-FETOPROTEIN (AFP) levels. Comparative  
20 transcriptome and associated pathways in unstimulated and T3 and T4 stimulated HLCs revealed  
21 regulated expression of numerous genes within for example the peroxisome proliferator-activated  
22 receptor (PPAR), transforming growth factor beta (TGF- $\beta$ ), mitogen-activated protein  
23 kinase/extracellular-signal-regulated kinase (MAPK/ERK) signaling pathways and thyroid  
24 hormone synthesis. We propose the inclusion of combined T3 and T4 in HLC differentiation  
25 protocols to enhance maturation and therefore provide additional improvement in their  
26 applications in drug screening and disease modeling.

27 **Keywords:** Hepatocyte-like cells; pluripotent stem cells; Thyroid hormones; AFP; ALB; CYP3A7

28

---

29

## 30 1. Introduction

31 The adult liver, being the largest internal organ of the human body, is organized in four lobes  
32 and consists mainly of hepatocytes [1]. Origin of the liver during development lies within the  
33 endoderm, one of the three germ layers. It is highly involved in metabolism by detoxification, protein  
34 synthesis, and glucose and fatty acid metabolism [2].

35 Liver diseases are a major threat, and research leading to treatment of these diseases is highly  
36 important. Although the liver is capable of regenerating itself, making it unique in the field of organ  
37 regeneration, the regeneration ability is also limited and compromised, especially when it comes to  
38 end-stage liver diseases. Hepatocytes re-enter the cell cycle and proliferate into new liver tissue,  
39 therefore not regenerating in a classical way, but compensating by building new liver mass [3]. The  
40 increasing number of liver diseases and the limited number of donor organs increase the importance  
41 of discovering optimal medical treatment plans for liver diseases. According to the regeneration  
42 potential of the liver, transplanting hepatocytes could also be used as treatment method, as the  
43 transplanted hepatocytes would replace the damaged liver tissue [4]. Immune rejection and  
44 insufficient isolation from donor liver tissue are problems occurring during treatment of liver  
45 diseases [5].

46 Primary human hepatocytes (PHH) are used as in vitro models of the liver, but difficulties arise  
47 in deriving and cultivating PHHs in vitro, as proliferation conditions are not yet completely  
48 understood [6]. To circumvent this problem, renewable sources for generating liver tissue have been  
49 established, resulting in the development of protocols for pluripotent stem cell-derived hepatocyte-  
50 like cells (HLCs) in two- and three dimensional cultures. Yamanaka et al. were able to generate  
51 induced pluripotent stem cells (iPSCs), thereby overcoming issues of immune rejection when patient  
52 specific cells are used or ethical issues faced with using embryonic stem cells [7]. This paved new  
53 paths in the field of regenerative medicine and disease modeling [8]. Many attempts to generate  
54 HLCs from ESCs and iPSCs using various small molecules and factors have been reported [9]–[12];  
55 Varghese et al. compared growth factor- and small molecule-induced differentiation protocols to find  
56 the most robust and cost-effective protocol [10]. Of late, protocols involving 3D cultures are on the  
57 rise, because 2D cultures are limited by de-differentiation and lack interactions between cells and  
58 extracellular niche, thereby limiting clinical application [13], [14]. Although the liver is not rich in  
59 extracellular matrix (ECM), ECM is crucial in maintaining the differentiated state of hepatocytes by  
60 inducing intracellular signaling, hence it also plays a role in interactions within hepatocytes and  
61 maintaining functionality and polarity in 3D models [6]. Hepatic 3D cultures have been shown to  
62 resemble the liver more in terms of phenotype and gene expression [6]. Rashidi et al. showed the  
63 importance of differentiation in 3D, they generated 3D liver organoids that were kept in culture for  
64 over a year and still exhibiting CYP3A activity [13]. So far published protocols, both 2D and 3D, have  
65 not achieved significant down-regulation of the fetal markers-AFP and CYP3A7.

66 In this study, we address the issue of generating mature HLCs exhibiting the same functionality  
67 as liver biopsy-derived hepatocytes. We observed down-regulated expression of the fetal marker AFP  
68 and to a lesser extent also CYP3A7. Based on this, we propose the addition of synthetic analogs of the  
69 thyroid hormones triiodo-L-thyronine (T3) and L-thyroxine (T4) in the cell culture medium. Thyroid  
70 hormones are normally produced by the thyroid gland [15].

## 71 2. Materials and Methods

### 72 2.1. Culture of pluripotent stem cells

73 A previously established urine SIX2-progenitor cell derived induced pluripotent stem cell (iPSC)  
74 line ISRM-UM51 [16] and embryonic stem cell (ESC) line H9 (WiCell, Madison, WI, USA) were used  
75 for this experiment. The pluripotent stem cells (PSCs) were maintained on Matrigel®-coated dishes.  
76 For cultivation, StemMACS iPS-Brew XF Medium with 1% Penicillin/Streptomycin (P/S) was used.  
77 The medium was changed on a daily basis and at a confluency of about 80%; the cells were harvested  
78 and split. For this, the iPS cells were incubated with PBS (-/-) for seven minutes at room temperature  
79 and then scrapped off the plate and the cell suspension was centrifuged at 40 G for five minutes.

80 2.1.1. Ethics statement

81 The use of iPSC lines for this study was approved by the ethics committee of the medical faculty  
82 of Heinrich-Heine University under the study number 5704.

83 2.2. *Differentiation of PSCs to Hepatocytes*

84 Dose dependency of the thyroid hormones was confirmed by preliminary experiments with  
85 HepG2 cells according to Conti et. al, who showed that addition of the thyroid hormones at a  
86 concentration of  $10^{-6}$  or  $10^{-8}$  M suppressed AFP secretion. The iPSC and ES-H9 cells were differentiated  
87 to hepatocyte-like cells (HLC) following our previously described and slightly modified three step  
88 protocol [12], [17], [18]. In the first step, the cells were differentiated into the definitive endoderm  
89 (DE), using DE medium (96% RPMI 1640, 2% B27 without retinoic acid, 1% GlutaMAX®, 1% P/S and  
90 supplemented with 100 ng/mL Activin A (Peprotech, Hamburg, Germany, 1:1000) and CHIR99021  
91 (Tocris, Wiesbaden-Nordenstadt, Germany, 20 mM) (added only on the first day, 1:8000). The second  
92 step drives the cells into hepatic endoderm (HE), cells are cultured from day 4 to 7 in HE medium  
93 consisting of 78% Knock-Out DMEM, 20% Knock-Out Serum, 0.5% GlutaMAX®, 1% P/S, 0,01% 2-  
94 Mercaptoethanol (all Gibco) and 1% DMSO (Sigma). Finally, for the maturation step (82% Leibovitz15  
95 Medium, 8% fetal bovine serum, 8% Tryptose Phosphate Broth, 1% P/S, 1% GlutaMAX® (all Gibco)  
96 and 0.06% Insulin (Sigma), supplemented with hepatocyte growth factor (HGF) (Peprotech 10  
97 ng/mL), dexamethasone (DEX) (25 ng/mL) were used. For the first two steps medium was changed  
98 every day, and then every second day in the last step. T3/T4 were included in the maturation medium  
99 from day 8 onwards. One milliliter cell culture supernatant was collected from each stage DE, HE  
100 and HLC different conditions before medium change for UREA or ELISA assays and stored at  $-20^{\circ}\text{C}$ .

101 In a first differentiation, UM51-derived HLCs were incubated with either  $10^{-6}$  M T3 or a  
102 combination of  $10^{-6}$  M T3 and T4 respectively. In a second differentiation, to compare the effects of  
103 T3 and T4 on the differentiation of iPSCs and ESCs, a combination of  $10^{-6}$  M T3 and T4 was added to  
104 the HLC medium of both UM51- and H9-derived HLCs during the maturation stage.

105 2.2.1. Immunocytochemistry

106 For immunofluorescence staining, cells were fixed with 4% Paraformaldehyde for fifteen  
107 minutes, followed by two hours blocking of unspecific binding sites using blocking buffer composed  
108 of 10% normal goat serum (NGS, Sigma), 1% bovine serum albumin (BSA, Sigma), 0.5% Triton (Carl  
109 Roth GmbH & Co. KG, Karlsruhe, Germany) and 0.05% Tween 20 (sigma), all dissolved in PBS. If the  
110 target stain was extracellular, Triton and Tween were excluded from the blocking buffer. Primary  
111 antibodies were incubated overnight at  $4^{\circ}\text{C}$ ; AFP (1:200), ALB (1:500) (Sigma-Aldrich Chemie),  
112 HNF4 $\alpha$  (1:250; Abcam), SOX17 (1:50; R&D Systems), E-CAD (1.200; Cell Signaling Technology®)  
113 followed by one hour secondary antibody incubation; Alexa488 and Cy3 (Thermo Fischer Scientific,  
114 1:2000), as well as Hoechst 33258 dye (Sigma-Aldrich, 1:5000) for cell nuclei staining. Imaging was  
115 done using a fluorescence microscope (LSM700; Zeiss, Oberkochen, Germany) and the ZenBlue 2012  
116 Software Version 1.1.2.0 (Carl Zeiss Microscopy GmbH, Jena, Germany) for picture processing.

117 2.2.2. RNA Isolation and cDNA synthesis

118 The Direct-zol RNA Miniprep Kit (Zymo Research, CA, USA) was used for RNA isolation  
119 according to manufacturer's instruction. Five hundred nanogram of the isolated RNA were reverse  
120 transcribed into complementary DNA (cDNA) synthesis using the TaqMan Reverse Transcription  
121 (RT) Kit (Applied Biosystems). The reaction mixture (10 $\mu\text{l}$  per sample) included 3.85  $\mu\text{L}$  H<sub>2</sub>O, 1  $\mu\text{L}$   
122 reverse transcriptase buffer, 2.2  $\mu\text{L}$  MgCl<sub>2</sub> (25 mM), 0.5  $\mu\text{L}$  Oligo (dT)/ Random hexamer (50  $\mu\text{M}$ ),  
123 2 $\mu\text{L}$  dNTP mix (10 mM), 0.2  $\mu\text{L}$  RNase Inhibitor (20 U/ $\mu\text{L}$ ) and 0.25  $\mu\text{L}$  Reverse Transcriptase (50  
124 U/ $\mu\text{L}$ ).

### 125 2.2.3. Quantitative real-time polymerase chain reaction (qRT-PCR)

126 Quantitative real-time PCR was carried out in a VIIA7 machine (Life technologies), each  
127 sample in triplicate. One  $\mu\text{L}$  cDNA of each sample was placed in each well and 9  $\mu\text{L}$  of the Master  
128 Mix consisting of Power SYBR Green Master Mix (Life technologies), water and primers purchased  
129 from MWG. The specific primer sequences are provided in supplementary table S2. The  
130 housekeeping gene ribosomal protein S16 (RPS16) was used for normalization of the tested genes.  
131 The program started with denaturation of the samples at 95°C for two minutes, followed by forty  
132 cycles amplification with a thirty seconds denaturation step at 95°C, annealing step at the primer-  
133 specific temperature (57°C to 63°C) for thirty seconds and extension at 72°C for thirty seconds. The  
134 expression levels were calculated using the  $\Delta\Delta\text{CT}$  method and are shown as mean values with  
135 standard error of mean.

### 136 2.2.4. Western blot analysis

137 For the protein extraction, cells were harvested and lysed in RIPA buffer (Sigma Aldrich)  
138 supplemented with a complete protease and phosphatase inhibitors cocktail (Roche, Sigma), and  
139 protein quantified using the Pierce BCA Kit. Further, cell lysates were loaded on a 4 - 20% Bis-Tris  
140 gel (Invitrogen) and proteins blotted onto a 0.45  $\mu\text{m}$  nitrocellulose membrane (GE Healthcare Life  
141 Sciences). The membranes were then blocked with 5% skimmed milk in Tris-Buffered Saline Tween  
142 (TBS-T) and incubated overnight at 4°C with the respective primary antibodies from Sigma-Aldrich  
143 Chemie: ALB (1:2500 mouse, TBS-T 5% Milk) and AFP (1:2000 rabbit, TBS-T 5% Milk) or from CST:  
144  $\beta$ -actin (1:5000 mouse, TBS-T 5% Milk). For the detection HRP (horseradish peroxidase) coupled  
145 secondary antibodies ((1:4000) were used and detected via chemiluminescence on a Fusion FX  
146 instrument (PeqLab). Signals were quantified with Fiji (Image J) and normalized to  $\beta$ -actin.  
147 Significance was calculated by ANOVA.

### 148 2.2.5. Fluorescence activated cell sorting (FACS)

149 For flow cytometric analyses, cells were harvested with trypsin, fixed for 15 min with 2% PFA  
150 and permeabilized with 0.5% Triton in PBS. Primary antibody incubation was carried out overnight.  
151 After 3 times washing, cells were incubated for 1h in the dark. Flow cytometric analysis was  
152 performed on a CyAn and analyzed with the summit software.

## 153 2.3. Hepatocyte functionality tests

### 154 2.3.1. Indocyanine Green (ICG) clearance test

155 Here we aimed at investigating the uptake and release of indocyanine green (ICG) by the HLCs  
156 as a measure of active transport. The dye, Cardiogreen (1 mg/mL) in HLC medium was added in one  
157 well and the cells incubated for thirty minutes at 37°C. Afterwards, cells were washed with PBS (+/+)  
158 and medium changed. ICG clearance was observed over a period of twenty hours and images  
159 captured under a light microscope.

### 160 2.3.2. Urea Assay

161 The QuantiChrom™ Urea Assay Kit was used to measure Urea secretion of the HLCs. Media  
162 from the stages DE, HE and HLC were taken from all conditions of the cells and stored at -20°C. The  
163 urea assay was carried out according to the manufacturer's instructions. Final concentrations of  
164 secreted urea were calculated and analyzed using the prepared standard curve.

### 165 2.3.3. Glycogen storage

166 First, cells were fixed with 4% PFA and then treated with periodic acid solution for 5 minutes,  
167 followed by several washing steps with water. Afterwards, cells were incubated in Schiff's Reagent

168 for fifteen minutes and then the cell nuclei stained with hematoxylin for ninety seconds. Finally, cells  
169 were washed again with water and images captured under a light microscope.

#### 170 2.4. Transcriptome analysis

171 HLCs treated with T3/T4 hormones and untreated as well as commercial fetal and adult liver  
172 samples were submitted to the BMFZ (Biomedizinisches Forschungszentrum) core facility of the  
173 Heinrich-Heine Universität, Düsseldorf for microarray hybridization on the Affymetrix Human  
174 Clariom S assay. Raw data (CEL files) were read into the R/Bioconductor environment [19].  
175 Background-correction and normalization via the Robust Multi-array Average (RMA) method were  
176 achieved using the R package oligo [20]. The dendrogram was calculated via the R hierarchical  
177 clustering function hclust using Pearson correlation and complete linkage agglomeration. Gene  
178 expression was determined with a detection-p-value threshold of 0.05 while the detection-p-value  
179 was assessed according to the method from Graffmann et al. [18]. Venn diagrams were drawn based  
180 on the gene expression determined this way with the R VennDiagram package [21].

##### 181 2.4.1. Analysis of pathways and Gene ontologies (GOs)

182 KEGG (Kyoto Encyclopedia of Genes and Genomes) [22] pathways and associated genes were  
183 downloaded from the KEGG website in March 2018. Overrepresented pathways were determined  
184 via the R-built-in hypergeometric test. Up- and down-regulated genes in the KEGG PPAR signaling  
185 pathway chart were marked in red (up-regulation) and green (down-regulation) via the R pathView  
186 package [23] using log<sub>2</sub>-ratios between T3/T4-treated and untreated HLCs. Overrepresented GOs  
187 were detected employing the R package GOstats [24].  
188

##### 189 2.4.2. Data Availability

190 All microarray data will be made available at NCBI GEO under the accession number XXX when  
191 the manuscript is accepted.  
192

### 193 3. Results

#### 194 3.1. HLC Differentiation

195 The iPSC- line UM51 was differentiated into HLCs following our modified three step protocol  
196 [12], [17], [18]. HepG2 cells were treated for seven days and medium was changed on every second  
197 day. Afterwards, immunofluorescence stainings for ALB and AFP were performed, as well as a qRT-  
198 pCR and a Western blot. From these results we concluded that  $10^{-6}$  M is the best concentration for the  
199 treatment- figure S1. At day eight of the differentiation protocol, T3 and a combination of T3 and T4  
200 were added to the differentiation medium. In a second experiment, differentiation efficiency between  
201 iPSCs and ESCs was compared. The iPSC- line UM51 and the ESC-line H9 were differentiated into  
202 HLCs in the same way, but comparing standard HLC condition versus addition of the combination  
203 of T3 and T4. The differentiations were stopped after eighteen days. Phase contrast images of the cells  
204 were captured at distinct stages throughout the differentiation in order to analyze changes in cell  
205 morphology, Figure 1. At the pluripotent stage (day 0), the cells showed the typical sharp edged and  
206 well defined colonies. During the differentiation, typical cell morphology changes were observed in  
207 the DE, HE and HLC stages, resulting in cobblestone epithelial shaped cells. In addition to the phase  
208 contrast images, cells of all stages were stained for the expression of typical markers of each stage  
209 (Fig 1). In the DE stage, the cells expressed the transcription factor SOX17, which is involved in cell  
210 fate decision and plays a key role in embryonic development. In the HE stage, most cells expressed  
211 the transcription factor HNF4 $\alpha$ , which is essential for liver development, and some cells expressed  
212 AFP, which is a fetal marker of the liver, usually expressed only during development.

213 At the maturation stage, after eighteen days of differentiation, up to 85% of HLCs expressed  
214 ALB (Fig. 1, S2), which is known as a maturation marker in the liver, however, a few cells still  
215 expressed the fetal marker AFP (Fig. 1). ALB and AFP immunostaining images comparing HLCs  
216 generated under standard condition and those treated with T3 and T4 are shown in supplementary  
217 Figure S3.

218

219

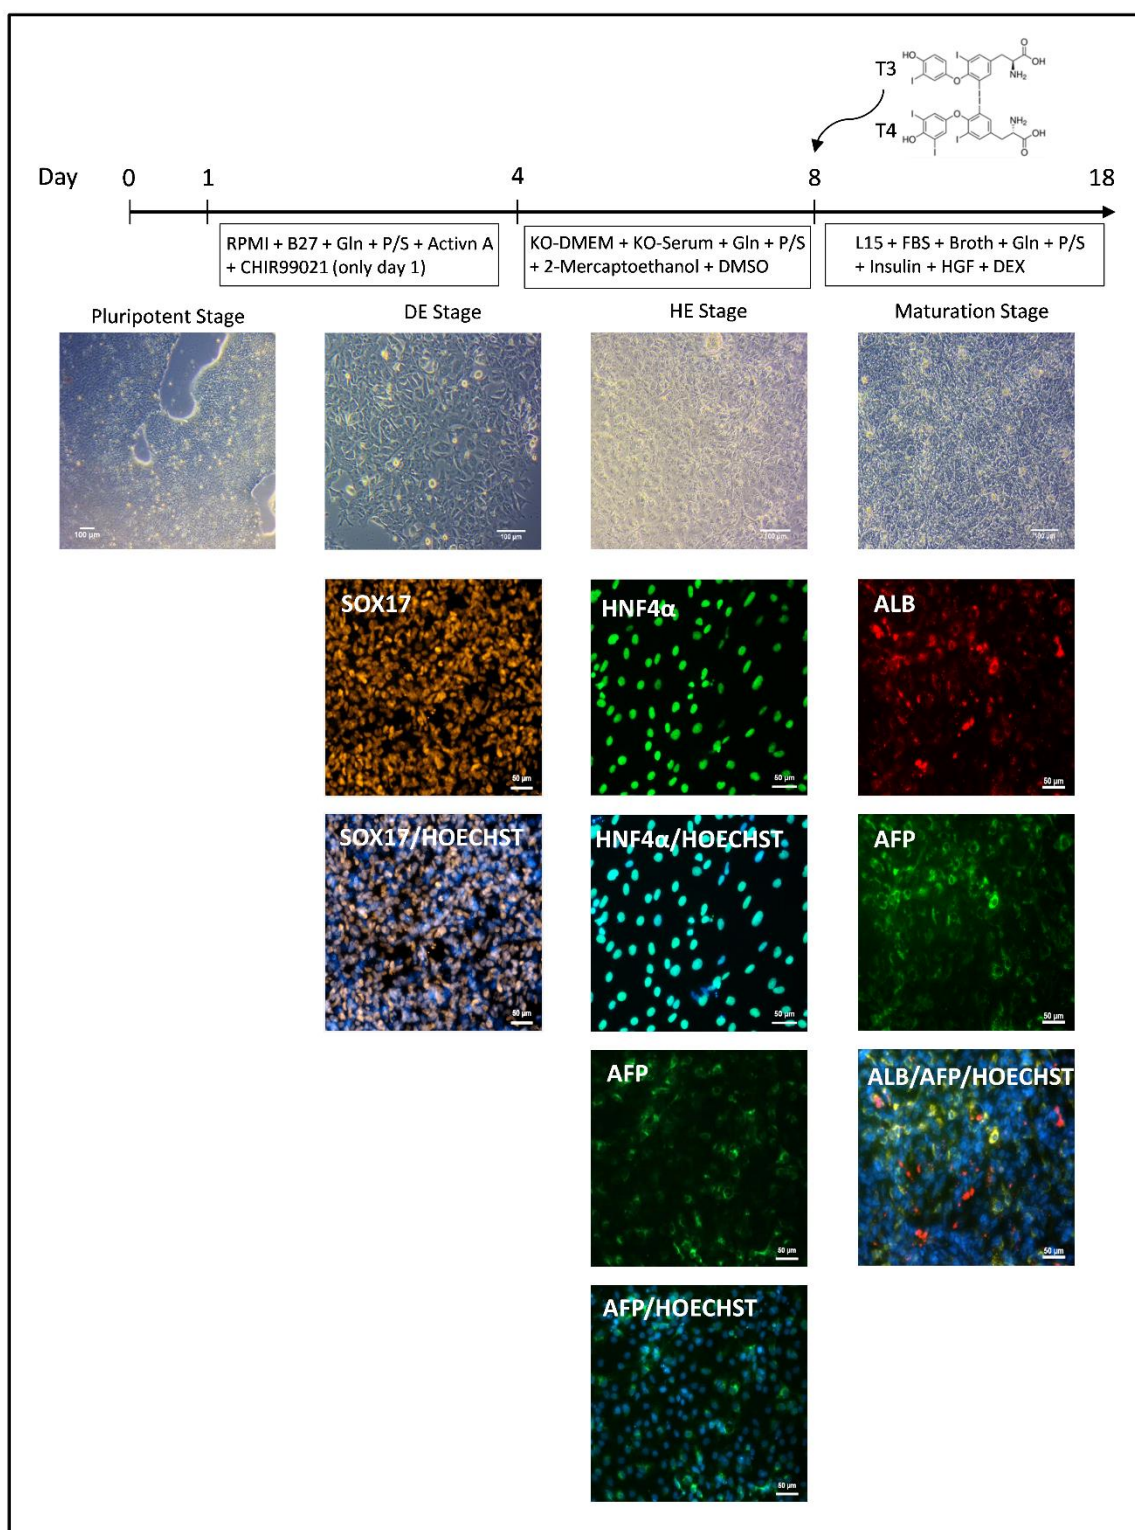

220

221 **Figure 1.** Differentiation scheme of pluripotent stem cells into hepatocyte-like cells. For each stage of  
222 differentiation, a phase contrast picture of the cells and a staining specific for each stage is provided.  
223 Beginning at day eight, T3 and T4 were included in the differentiation medium until the end. (Bright-  
224 field images Scale bars = 100  $\mu$ m, immunostaining images scale bars = 50  $\mu$ m).

### 225 3.1.1. HLC functionality assays

226 In order to confirm the generation of HLCs, functionality assays were performed. The generated  
227 iPSC-derived HLCs cells were able to store glycogen, as seen by magenta color retained by the cells,  
228 Figure 2A. Furthermore, the cells were able to take up and release the green dye ICG, Figure 2B. The  
229 ICG clearance is a common test for liver functionality, as only mature and functional livers are able  
230 to take up and release ICG.

231 In addition, conditioned medium was collected from the cells and urea secretion measured.  
232 The HLCs in all conditions showed a urea secretion of more than 10 mg/dl after sixteen and eighteen  
233 days (Fig. 2C). Interestingly, longer differentiation seemed to decrease urea secretion in the HLC +  
234 T3/T4 condition after eighteen days. Moreover, after eighteen days of differentiation all HLCs  
235 showed cytochrome P450 3A4 activity, with the lowest activity observed in the HLC + T3/T4  
236 condition (Fig. 2D).

237

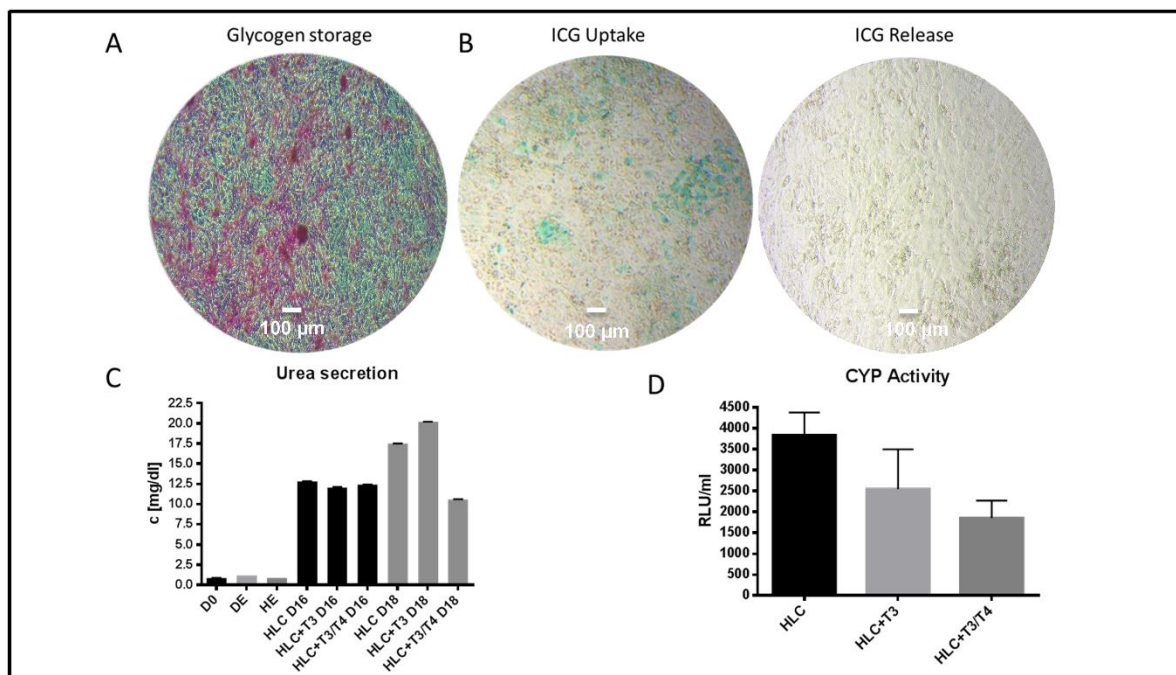

238

239 **Figure 2.** Functionality assays carried out for the generated HLCs. A glycogen storage assay, ICG  
240 Uptake-Release assay, urea assay and CYP-Activity assay for the cytochrome P450 3A4 were  
241 performed. (A) The cells were able to store glycogen. (B) The cells were able to take up ICG and release  
242 it completely after 18 hours. (C) Cells from day 0, DE stage and HE stage secreted nearly no urea,  
243 whereas HLCs from day 16 and day 18 of differentiation secreted all more than 10 mg/dl urea. (D) All  
244 generated HLCs showed activity of the CYP3A4. (Bright-field images Scale bars = 100 μm).

### 245 3.1.2. Confirmation of expression of T3 and T4 regulated genes

246 Gene expression of fetal and adult genes of the HLCs was analyzed by qRT-PCR. The fetal gene  
247 AFP was downregulated in iPSC-derived HLCs after addition of T3 and T3/T4 to the differentiation  
248 protocol, but only significantly in the T3 condition (Fig. 3A, B and C). Furthermore, the maturation  
249 markers ALB, CYP3A4, A1AT and TTR were expressed in all conditions. The fetal marker CYP3A7  
250 was slightly downregulated in HLCs after addition of T3 and T3/T4 to the differentiation medium  
251 (Fig. 3A). In the parallel differentiation comparing UM51 and H9 derived HLCs, the fetal markers  
252 AFP and CYP3A7 were downregulated after addition of T3/T4, whereas ALB is expressed in both  
253 HLC preparations (Fig. 3B and C, Figure S3).



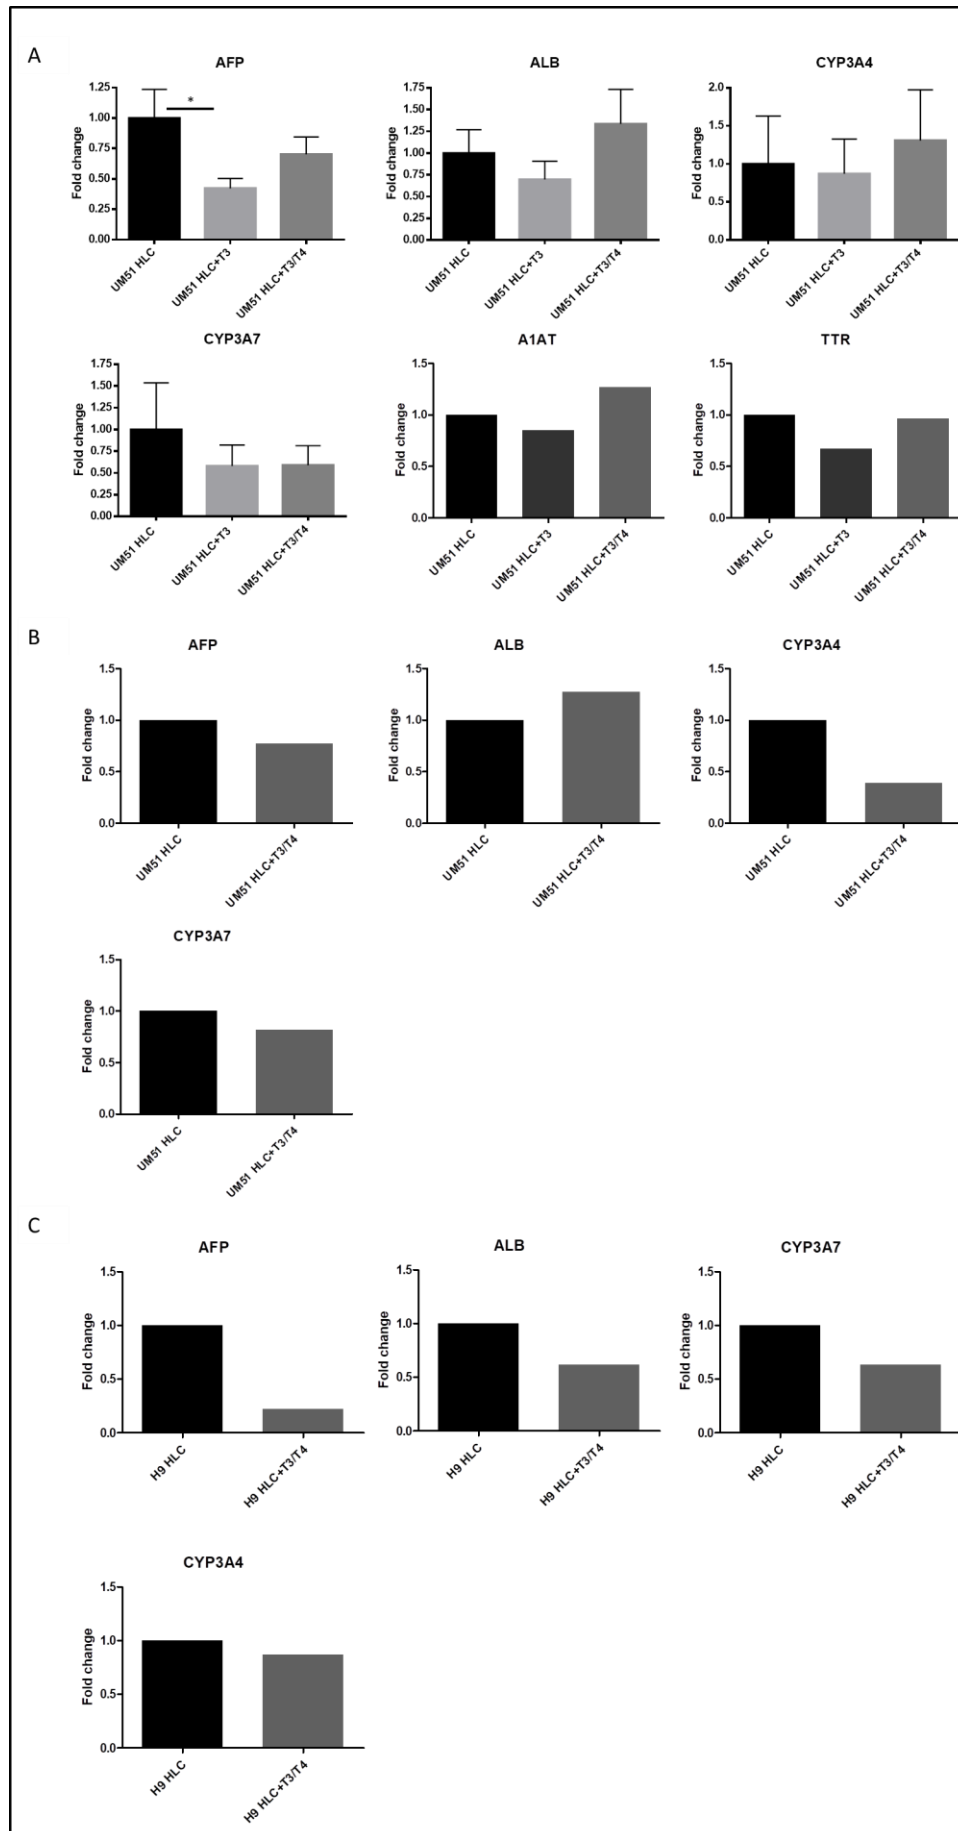

255 **Figure 3.** qRT-PCR carried out for the generated HLCs. (A) qRT-PCR for HLCs generated from iPSC-  
 256 line UM-51 with primers used for AFP, ALB, CYP3A4, CYP3A7, A1AT and TTR. AFP was  
 257 significantly downregulated after treatment with T3. n=3 for AFP, ALB, CYP3A4 and CYP3A7, n=1  
 258 for A1AT and TTR. (B) Second qRT-PCR for HLCs generated from iPSC-line UM-51 with primers  
 259 used for AFP, ALB, CYP3A4 and CYP3A7 only treated with T3/T4. n=1. (C) qRT-PCR for HLCs  
 260 generated from ESC-line H9 with primers used for AFP, ALB, CYP3A4 and CYP3A7, n=1. Error bars  
 261 represent S.E.M., \* =  $p < 0.05$

### 262 3.2. Down regulated protein expression of AFP

263 In the iPSC-derived HLCs, the fetal marker AFP was significantly downregulated on the protein  
 264 level after addition of T3 and T3/T4 to the differentiation protocol (Fig. 4A). In additional  
 265 differentiation comparing ESC-derived and iPSC-derived HLCs by adding T3/T4, Western blot  
 266 analysis revealed a downregulation of AFP both in ESC- and iPSC-derived HLCs after addition of  
 267 T3/T4. In accordance with this observation, secreted AFP levels were also reduced after T3/T4  
 268 treatment of ESC derived HLCs (Supplementary Fig. S4).

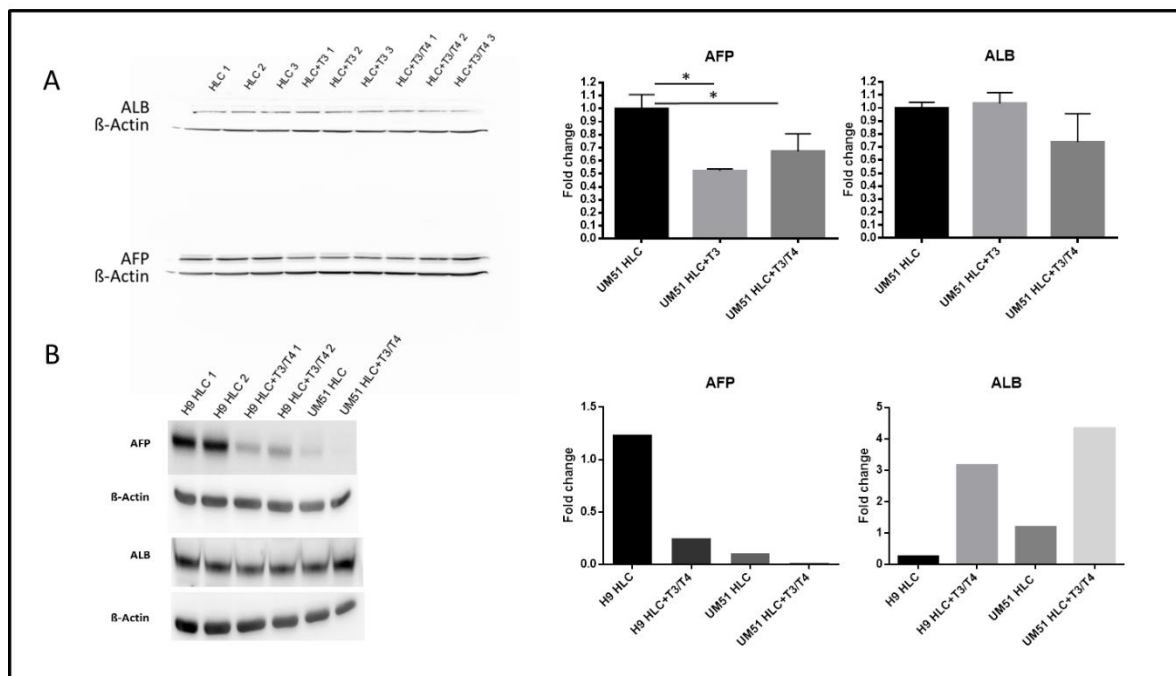

269

270 **Figure 4.** Western blot was performed for ALB and AFP for the HLCs. (A) Western blot for HLCs  
 271 generated from iPSC-line UM-51. AFP was significantly downregulated after adding T3 and T3/T4 to  
 272 the differentiation protocol. ALB showed no significant changes within the different conditions. n=3  
 273 (B) Western blot of HLCs generated from ESC-line H9 and iPSC-line UM-51. AFP was downregulated  
 274 in both cell lines after addition of T3/T4, while ALB was upregulated. For H9 HLC and H9 HLC+T3/T4  
 275 n=2, for UM51 HLC and UM51 HLC+T3/T4- n=1, for evaluation n=1 for all samples for a better  
 276 comparison. Error bars represent S.E.M., \* =  $p < 0.05$

### 277 3.3. Transcriptome analysis

278 ESC- and iPSC-derived HLCs with and without addition of T3/T4 were subjected to  
 279 transcriptome analysis together with samples of fetal and adult liver as control. The dendrogram in  
 280 Figure 5A resulting from global transcriptome cluster analysis with a coefficient of variation (cv) >  
 281 0.1 shows a cluster of adult and fetal liver and a cluster of HLCs with two sub-clusters determined  
 282 by the original cell source. In Figure 5B, a table of Pearson correlation coefficients of gene expression  
 283 data of all samples versus each other is depicted.

284 Supplementary table S1 shows that the treatment of H9-HLCs with T3/T4 resulted in down-  
 285 regulation of numerous metabolic pathways such as Drug metabolism - cytochrome P450 ( $p=0.0002$ ,  
 286  $q=0.0031$ ), Metabolism of xenobiotics by cytochrome P450 ( $p=0.0003$ ,  $q=0.0031$ ), Glutathione  
 287 metabolism ( $p=0.0027$ ,  $q=0.0108$ ), Pyruvate metabolism ( $q=0.0437$ ) and Glycolysis ( $p=0.0460$ ,  $q=0.092$ ).  
 288 In treated UM51-iPSC-HLCs, down-regulated pathways were over-represented with a considerably  
 289 higher significance due to a higher number of involved genes as shown in Supplementary table S1.  
 290 Cholesterol metabolism was most significant ( $p=1.46E-07$ ,  $q=4.2E-06$ ), followed by Fat digestion and  
 291 absorption ( $p=4E-05$ ,  $q=0.0004$ ), Complement and coagulation cascades ( $p=4.3E-05$ ,  $q=0.0004$ ) and  
 292 vitamin digestion and absorption ( $p=0.0003$ ,  $q=0.0018$ ). In the pathways over-represented in the up-  
 293 regulated genes in T3/T4-treated H9-HLCs compared to untreated H9-HLCs (Supplementary Table  
 294 S1) we identified Thyroid hormone synthesis ( $p=0.032$ ,  $q=0.0668$ ). Furthermore, we found thyroid  
 295 hormone generation ( $p=0.0009$ ) in the GOs over-represented in up-regulated genes in T3/T4-treated  
 296 UM51-HLCs compared to untreated UM51-iPSC-HLCs (Supplementary Table S1). We analyzed  
 297 cytotoxicity at the transcriptome level by assessing genes from the KEGG pathway “Natural killer  
 298 cell mediated cytotoxicity”. The heatmap in Supplementary Figure S5 demonstrates that there is no  
 299 specific change in cytotoxicity-related gene expression induced by the T3/T4 treatment. Furthermore,  
 300 we examined genes from the proliferation-related KEGG pathway “Cell cycle” at the transcriptome  
 301 level and found that there were non-significant changes as shown in the heatmap Supplementary  
 302 Figure S6.

303  
 304 Finally, we checked for GOs overrepresented in genes commonly up- or down-regulated in  
 305 HLCs from H9 and UM51 cells after T3/T4 treatment (Supplementary Table S1). Interestingly, we  
 306 found that mesenchymal cell differentiation was among the common down-regulated GOs. This  
 307 might imply a higher stability within the epithelial HLC population as aberrant de-differentiation  
 308 into a mesenchymal phenotype seems to be suppressed by T3/T4.

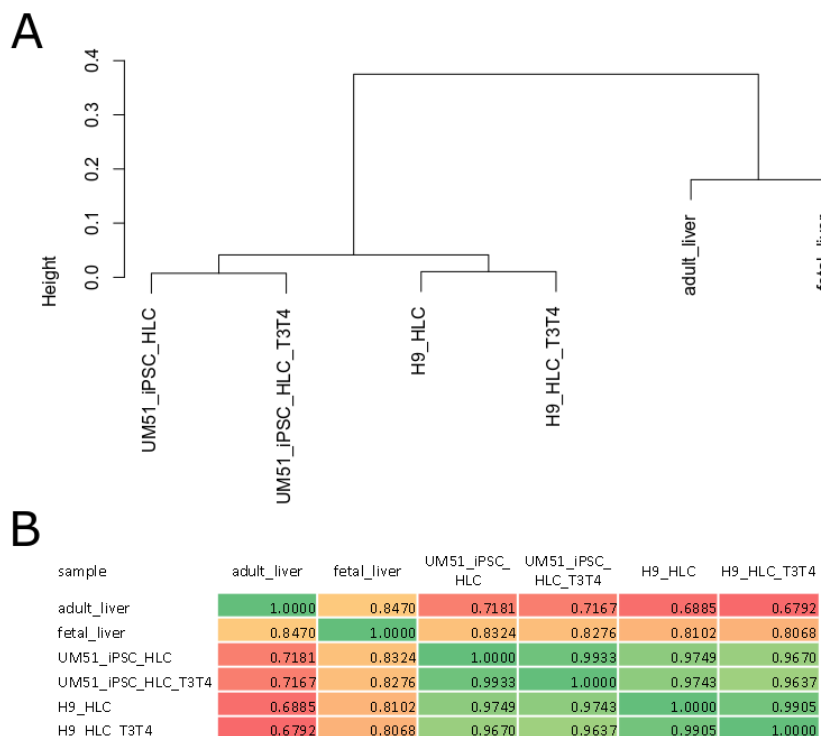

309

310 **Figure 5.** Global transcriptome cluster analysis and Pearson correlations. (A) The dendrogram results  
 311 from global transcriptome cluster analysis of probesets with a coefficient of variation ( $cv$ ) > 0.1 using  
 312 Pearson correlation as similarity measure and complete linkage as cluster agglomeration method. (B)

313 The table shows the Pearson correlation coefficients of gene expression data of all samples vs. each  
 314 other.

315 3.3.1. Analysis of the PPAR signaling pathway

316 We investigated in more detail the peroxisome proliferator-activated receptor (PPAR) signaling  
 317 pathway in which we found down-regulated genes in the T3/T4-treated H9-HLCs and UM51-iPSC-  
 318 HLCs (Supplementary Table 1). PPAR signaling plays a key role in the liver [25] - not only by  
 319 regulating metabolism, but also by modulating cell differentiation, proliferation, apoptosis, and  
 320 aging. The addition of T3/T4 to HLCs in our experiments down-regulates most genes in the PPAR  
 321 signaling pathway. The KEGG pathway chart in Figure 6 shows up- or down-regulation of several  
 322 genes in untreated UM51-iPSC-derived HLCs (left part of the gene boxes) and T3/T4-treated UM51-  
 323 iPSC-derived HLCs (right part of the gene boxes). Reciprocal regulation between Thyroid receptors  
 324 (TR) and PPARs has already been reported for rodents by Flores-Morales et al. [26] and Lu and Cheng  
 325 [27].  
 326

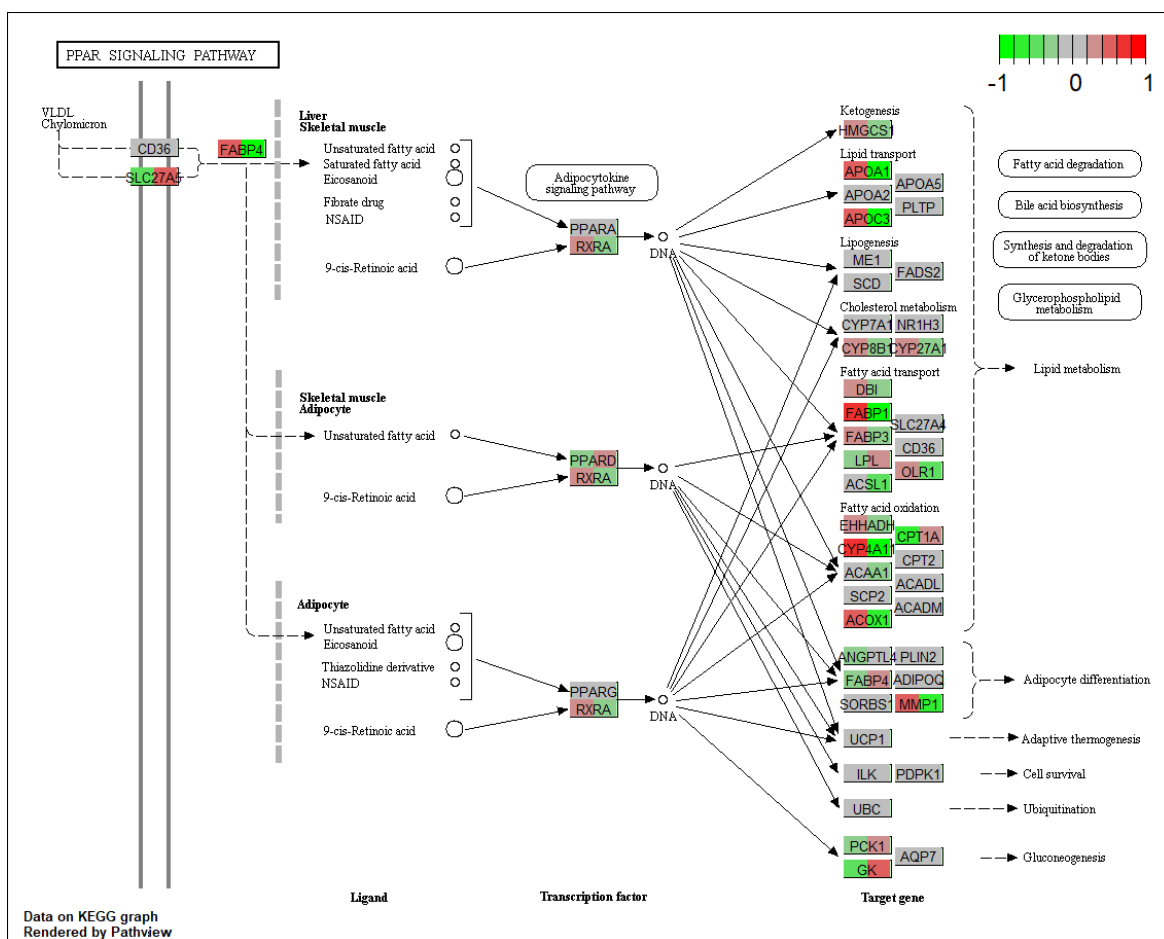

327

328 **Figure 6.** Pathway chart of PPAR signaling pathway indicating T3/T4-mediated up- or down-  
 329 regulation. The chart shows up- or down-regulation of genes in untreated UM51-iPSC-derived HLCs  
 330 (left part of the gene boxes) and T3/T4-treated UM51-iPSC-derived HLCs (right part of the  
 331 gene boxes). Log2-ratios were calculated by taking log2 of the quotient of the expression of HLC or T3/T4-  
 332 treated HLC divided by the mean of HLC and T3/T4-treated HLC. The color scale is located in the top  
 333 right of the chart, red indicates up-regulation, green down-regulation.

334 3.3.2. Comparison of T3/T4-treated HLCs with adult and fetal liver

335 We set out to further elucidate the gene expression patterns of the distinct conditions tested in  
336 our experiments in more detail. With this intention, we dissected expressed genes filtered via a  
337 threshold for a detection-p-value < 0.05 in a Venn diagram comparing the four conditions of fetal  
338 liver, adult liver and HLCs untreated and treated with T3/T4 thyroid hormones (Figure 7A). Of most  
339 relevance we considered genes which were expressed in common in T3/T4 treated HLCs and adult  
340 liver. Our hypothesis was that by the overlap with the adult phenotype these genes would indicate  
341 maturation of the HLCs induced by the T3/T4 thyroid hormone treatment. Nineteen genes were  
342 expressed in T3/T4-treated HLCs and in adult liver in common (marked in yellow). These nineteen  
343 genes were subjected to a KEGG pathway over-representation analysis (Figure 7B) which revealed  
344 inflammatory mediator regulation of TRP channels as most significant pathway. There is only limited  
345 knowledge on the role of TRP channels in liver including roles in cell proliferation, migration,  
346 lysosomal Ca(2+) release and development and progression of liver cancer [28]. The cold receptor  
347 TRPM8 which we identified here has been reported to be expressed in liver and mutations in TRPM8  
348 have been associated with impaired lipid levels [29] which are obviously connected to genuine liver  
349 functionality. Figure 7C lists GOs over-represented in the nineteen genes expressed in common in  
350 T3/T4-treated HLCs and in adult. Here, the results include two GOs related to MAPK/ERK signaling  
351 and the GO developmental maturation. MAPK signaling has been implicated in liver maturation  
352 particularly via p38 $\alpha$  MAPK [30], [31]. Looking into the gene lists of these GOs most outstanding is  
353 the gene NODAL – a part of the TGF $\beta$ -signaling pathway - which was described to force cell fate into  
354 mesoderm lineage upon low NODAL expression and into endoderm upon high expression [9], [32].  
355 An auto-regulatory loop reinforces NODAL expression and endoderm specification [32].

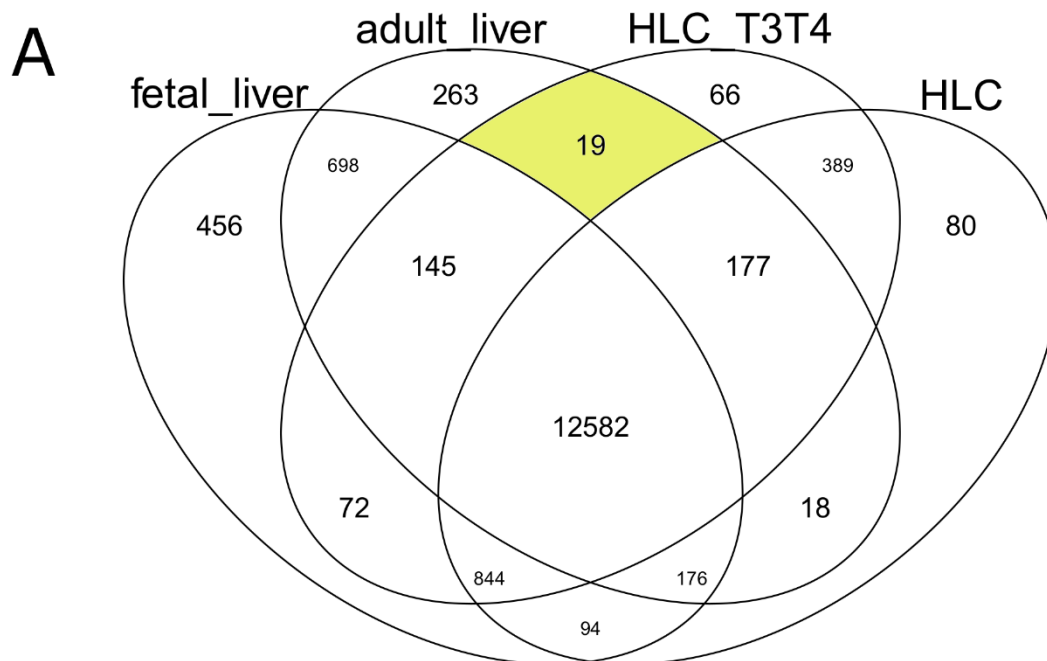

**B**

| KEGG_name                                        | p_hyper | q_hyper | genes              |
|--------------------------------------------------|---------|---------|--------------------|
| Inflammatory mediator regulation of TRP channels | 0.0001  | 0.0007  | CAMK2B,NTRK1,TRPM8 |
| Neurotrophin signaling pathway                   | 0.0077  | 0.0193  | CAMK2B,NTRK1       |
| Calcium signaling pathway                        | 0.0174  | 0.0290  | CAMK2B,TNNC2       |

**C**

| Term                                                             | GO_type | Pvalue  | genes                                   |
|------------------------------------------------------------------|---------|---------|-----------------------------------------|
| detection of temperature stimulus                                | GO_BP   | 0.00007 | NTRK1,TRPM8                             |
| lung development                                                 | GO_BP   | 0.00516 | CYP1A2,NODAL                            |
| regulation of synapse structure or activity                      | GO_BP   | 0.00860 | CAMK2B,NTRK1                            |
| anterograde trans-synaptic signaling                             | GO_BP   | 0.00884 | CAMK2B,NTRK1,SLC17A7                    |
| synaptic signaling                                               | GO_BP   | 0.00931 | CAMK2B,NTRK1,SLC17A7                    |
| nervous system process                                           | GO_BP   | 0.01003 | NTRK1,OR52M1,SLC17A7,TRPM8              |
| positive regulation of ERK1 and ERK2 cascade                     | GO_BP   | 0.01057 | NODAL,NTRK1                             |
| learning or memory                                               | GO_BP   | 0.01074 | NTRK1,SLC17A7                           |
| regulation of muscle system process                              | GO_BP   | 0.01116 | CAMK2B,TNNC2                            |
| positive regulation of DNA-binding transcription factor activity | GO_BP   | 0.01141 | NODAL,NTRK1                             |
| developmental maturation                                         | GO_BP   | 0.01282 | CAMK2B,SLC17A7                          |
| multicellular organism reproduction                              | GO_BP   | 0.01520 | NODAL,ODF3,TBATA                        |
| metal ion transport                                              | GO_BP   | 0.01599 | CAMK2B,SLC17A7,TRPM8                    |
| MAPK cascade                                                     | GO_BP   | 0.01960 | CAMK2B,NODAL,NTRK1                      |
| positive regulation of neuron differentiation                    | GO_BP   | 0.02147 | CAMK2B,NTRK1                            |
| methylation                                                      | GO_BP   | 0.02170 | CYP1A2,MRM1                             |
| cell morphogenesis                                               | GO_BP   | 0.02278 | CAMK2B,NODAL,NTRK1                      |
| positive regulation of cell projection organization              | GO_BP   | 0.02320 | CAMK2B,NTRK1                            |
| multi-organism reproductive process                              | GO_BP   | 0.02428 | NODAL,ODF3,TBATA                        |
| synapse organization                                             | GO_BP   | 0.02474 | CAMK2B,NTRK1                            |
| calcium ion transport                                            | GO_BP   | 0.02832 | CAMK2B,TRPM8                            |
| modulation of chemical synaptic transmission                     | GO_BP   | 0.02896 | CAMK2B,NTRK1                            |
| reproductive structure development                               | GO_BP   | 0.03025 | NODAL,NTRK1                             |
| divalent inorganic cation transport                              | GO_BP   | 0.03483 | CAMK2B,TRPM8                            |
| regulation of neuron projection development                      | GO_BP   | 0.03707 | CAMK2B,NTRK1                            |
| movement of cell or subcellular component                        | GO_BP   | 0.04115 | CAMK2B,NODAL,NTRK1,TNNC2                |
| system process                                                   | GO_BP   | 0.04430 | CAMK2B,NTRK1,OR52M1,SLC17A7,TNNC2,TRPM8 |
| detection of stimulus involved in sensory perception             | GO_BP   | 0.04444 | NTRK1,OR52M1                            |
| positive regulation of cell development                          | GO_BP   | 0.04459 | CAMK2B,NTRK1                            |
| spermatogenesis                                                  | GO_BP   | 0.04597 | ODF3,TBATA                              |
| response to inorganic substance                                  | GO_BP   | 0.04737 | CYP1A2,NTRK1                            |
| cell morphogenesis involved in neuron differentiation            | GO_BP   | 0.04926 | CAMK2B,NTRK1                            |
| whole membrane                                                   | GO_CC   | 0.03070 | CAMK2B,NTRK1,SLC17A7,TRPM8              |
| endoplasmic reticulum subcompartment                             | GO_CC   | 0.04354 | CAMK2B,CYP1A2,TRPM8                     |
| nuclear outer membrane-endoplasmic reticulum membrane network    | GO_CC   | 0.04553 | CAMK2B,CYP1A2,TRPM8                     |
| endoplasmic reticulum                                            | GO_CC   | 0.04765 | CAMK2B,CYP1A2,FAM19A1,TRPM8             |
| protein homodimerization activity                                | GO_MF   | 0.03144 | CAMK2B,NTRK1,TRPM8                      |
| actin binding                                                    | GO_MF   | 0.04865 | CAMK2B,TNNC2                            |
| ion channel activity                                             | GO_MF   | 0.04990 | SLC17A7,TRPM8                           |

357 **Figure 7.** Venn diagram comparison of gene expression in untreated and T3/T4-treated HLCs with  
358 adult and fetal liver. **(A)** Genes expressed (detection-p-value < 0.05) in untreated HLCs, T3/T4-treated  
359 HLCs, adult liver and fetal liver are compared in a venn diagram. Nineteen genes are expressed in  
360 T3/T4-treated HLCs and in adult liver in common. **(B)** KEGG pathways over-represented in the  
361 nineteen genes expressed in common in in T3/T4-treated HLCs and in adult. **(C)** Gene ontologies over-  
362 represented in the nineteen genes expressed in common in in T3/T4-treated HLCs and in adult.

#### 363 4. Discussion

364 Liver diseases are a major threat and a common cause of mortality [33]. To date, the only effective  
365 treatment for end-stage liver diseases is liver transplantation, but this is compromised by the low  
366 availability of donor organs, as well as immune rejection after transplantation. This has led to  
367 increased demand to find new alternative treatment options [5], especially in the field of regenerative  
368 medicine. The establishment of iPSC-derived hepatocyte-like cells has presented an enormous  
369 opportunity, as these cells can be used in patient- specific disease modeling and drug screening and  
370 development [34], thereby circumventing the risk of immune rejection after transplantation [4], [8].  
371 The only problem arising from this approach is the ability to generate mature and functional iPSC-  
372 derived hepatocyte-like cells which parallel liver-biopsy derived primary hepatocytes [34].

373 In this study, we focused on this aspect of hepatocyte-like cell maturation and investigated if  
374 this could be enhanced by stimulating the cell cultures with thyroid hormones T3 and T4. T3 is the  
375 mainly active and more potent form of thyroid hormones and derived from de-iodination of T4. T4  
376 is the major occurring form of the thyroid hormone in the blood and referred to as a storage form of  
377 T3. The conversion of T4 to T3 takes place directly in the target tissues. The functions of T3 and T4  
378 are mainly regulation of metabolism, as well as they play an essential role in development,  
379 differentiation and maturation of nearly all cells of the human body[15], [35]. The liver is known to  
380 be one of the main target organs for the thyroid hormones; the high interdependency between the  
381 thyroid gland and the liver results in risk of liver diseases when thyroid hormone levels are altered  
382 in an organism [36]. Two well described target genes of thyroid hormones are ALB, a liver maturity  
383 marker, and AFP, a fetal liver marker. Thyroid hormones have been shown to upregulate ALB and  
384 downregulate AFP in HepG2 cells [37], [38]. Tarim et al. showed that T3 promotes hepatocyte  
385 proliferation mediating organ growth, whereas in other organs T3 induced differentiation of several  
386 progenitor cells, thereby mediating cell maturation in the target organ [39]. As already mentioned  
387 above, the conversion of T4 to T3 takes place directly in the target tissues. Cvoro et al. also showed  
388 that T3 induced KLF9 in HepG2 cells. They also treated ESCs and iPSCs differentiated into definitive  
389 endoderm and terminally differentiated iPSC-derived hepatocytes with T3 and only showed  
390 successful KLF9 induction [40].

391 By adding T3 and T4 to the differentiation medium of pluripotent stem cell-derived HLCs, we  
392 aimed to enhance maturation of the generated HLCs. Our main focus was on the upregulation of the  
393 maturity marker ALB and the downregulation of the fetal marker AFP. After differentiation, cells  
394 were successfully stained for various liver markers; SOX17 at the DE stage, HNF4 $\alpha$  and AFP at the  
395 HE stage and ALB and AFP at the HLC stage (Fig. 1). The hepatocyte functionality tests- glycogen  
396 storage, ICG clearance, urea secretion and cytochrome activity assay- also confirmed maturation to a  
397 certain degree of the generated HLCs (Fig. 2). Of outmost interest for us was the mRNA and protein  
398 level expression of ALB and AFP. Indeed, our results show down-regulation of AFP expression after  
399 addition of the thyroid hormones compared to the standard HLC protocol without thyroid  
400 hormones. The down-regulation could be seen on both mRNA (Fig. 3) and protein levels (Fig. 4), thus  
401 indicating a stable decrease of AFP mediated by the thyroid hormones. On the mRNA level, we could  
402 also observe the expression of A1AT and TTR in the UM51-derived HLCs (Fig. 3A), which are two  
403 maturity markers of the liver. Although there was no significant change in gene expression after  
404 adding thyroid hormones to the differentiation, expression of these two genes in all iPSC-derived  
405 HLCs indicates successful differentiation into HLCs and maturation to a certain extent. Although we  
406 could not observe a significant difference in control HLCs and those differentiated with T3 or T3/T4,  
407 our data suggests that the addition of T3 to the differentiation slightly increases maturity and

408 functionality in pluripotent stem cell-derived HLCs in terms of cytochrome activity (Fig. 2D) and  
409 urea secretion, especially after eighteen days of differentiation (Fig. 2C), indicating that a longer  
410 differentiation may also increase maturity of HLCs.

411 Interestingly, when comparing iPSC- and ESC-derived HLCs, our data strongly suggests that  
412 urine-derived iPSCs seem to be more suitable for generation of mature HLCs. Western blot analysis  
413 revealed lower levels of the fetal marker AFP and higher levels of the maturity marker ALB in urine-  
414 derived iPSC-derived HLCs compared to ESC-derived HLCs. AFP could be further downregulated  
415 by addition of thyroid hormones (Fig. 4 B).

416 Detailed transcriptome analysis revealed that in line with reports mainly based on rodents T3/T4  
417 treatment has a reciprocal effect on PPAR signaling [25]. Further dissecting the overlap between the  
418 T3/T4 treated cells and the mature phenotype indicated at MAPK-signaling and also the NODAL  
419 branch of TGF $\beta$ -signaling as potential actors driving maturation. These findings were underpinned  
420 by previous studies reporting possible roles of MAPK in liver maturation [30], [31] and the well-  
421 settled role of NODAL in early liver development [32], but need further evaluation in larger studies.  
422 In addition, we saw that genes commonly reduced after T3/T4 treatment in H9 and UM51 derived  
423 HLCs were associated with mesenchymal cell development. Dedifferentiation of in vitro derived  
424 HLC into the mesenchymal lineage is a well-known problem of this process. Sometimes activation of  
425 the TGF $\beta$  pathway with small molecules is employed to counteract this phenomenon which might  
426 be dispensable in the presence of T3/T4.

## 427 5. Conclusions

428 Our findings have revealed that the thyroid hormones T3 and T4 downregulate the expression  
429 of the fetal liver markers and AFP and to a lesser extent CYP3A7 thereby driving pluripotent stem  
430 cell-derived hepatocyte-like cells a step closer towards maturation.

431 **Supplementary Materials: Table S1.** Gene list, GO analysis and KEGG pathways comparing H9 vs UM51 HLCs  
432 and T3T4 treated vs untreated HLCs. **Table S2.** List of specific primer sequences used for the quantitative real-  
433 time PCR. **Figure S1.** Concentration determination of T3 and T4 after 7 days treatment of HepG2 cells. **Figure**  
434 **S2:** Representative flow cytometric analysis of ALB expression in HLCs. Blue curve: secondary antibody control,  
435 green curve: ALB staining **Figure S3.** Immunostaining images of HLCs generated under standard condition  
436 compared to those generated under T3/T4 treatment, showing ALB and AFP staining. **Figure S4:** Western blot  
437 was performed with concentrated supernatants from ESC derived HLCs. (A) AFP could be detected in the  
438 supernatant. (B) Ponceau S staining. **Figure S5:** Genes from the KEGG pathway "Natural killer cell mediated  
439 cytotoxicity" (hsa04650) are not affected by the T3/T4 treatment. **Figure S6:** Genes from the KEGG pathway "Cell  
440 cycle" (hsa04110) are only marginally affected by the T3/T4 treatment.

441

442 **Author Contributions:** Conceptualization: J.A. and A.N.; Methodology, Investigation, Validation: A.N., J.G. and  
443 B.S.; Formal analysis N.G., A.N., J.A. and W.W.; Data curation: N.G and W.W.; Writing- original draft  
444 preparation: A.N., J.G. and W.W.; Writing – review and editing: J.A., W.W., N.G. and A.N.; Supervision: J.A.

445 **Funding:** JA acknowledges support from the Medical Faculty, Heinrich-Heine-University, Düsseldorf.

446 **Acknowledgments:** James Adjaye acknowledges support from the medical faculty of Heinrich Heine  
447 University- Düsseldorf, Germany.

448 **Conflicts of Interest:** The authors declare no conflict of interest.

449



## 450 References

- 451 1. K. Vdoviacová *et al.*, "Importance Rat Liver Morphology and Vasculature in Surgical Research.," *Med. Sci.*  
452 *Monit.*, vol. 22, pp. 4716–4728, Dec. 2016, doi: 10.12659/MSM.899129.
- 453 2. D. P. Bogdanos, B. Gao, and M. E. Gershwin, "Liver immunology.," *Compr. Physiol.*, vol. 3, no. 2, pp. 567–  
454 98, Apr. 2013, doi: 10.1002/cphy.c120011.
- 455 3. S. A. Mao, J. M. Glorioso, and S. L. Nyberg, "Liver regeneration.," *Transl. Res.*, vol. 163, no. 4, pp. 352–62,  
456 Apr. 2014, doi: 10.1016/j.trsl.2014.01.005.
- 457 4. E. Tsolaki and E. Yannaki, "Stem cell-based regenerative opportunities for the liver: State of the art and  
458 beyond.," *World J. Gastroenterol.*, vol. 21, no. 43, pp. 12334–50, Nov. 2015, doi: 10.3748/wjg.v21.i43.12334.
- 459 5. F. Oldhafer, M. Bock, C. S. Falk, and F. W. R. Vondran, "Immunological aspects of liver cell  
460 transplantation.," *World J. Transplant.*, vol. 6, no. 1, pp. 42–53, Mar. 2016, doi: 10.5500/wjt.v6.i1.42.
- 461 6. P. Godoy *et al.*, "Recent advances in 2D and 3D in vitro systems using primary hepatocytes, alternative  
462 hepatocyte sources and non-parenchymal liver cells and their use in investigating mechanisms of  
463 hepatotoxicity, cell signaling and ADME," *Arch. Toxicol.*, vol. 87, no. 8, pp. 1315–1530, Aug. 2013, doi:  
464 10.1007/s00204-013-1078-5.
- 465 7. K. Takahashi and S. Yamanaka, "Induction of Pluripotent Stem Cells from Mouse Embryonic and Adult  
466 Fibroblast Cultures by Defined Factors," *Cell*, vol. 126, no. 4, pp. 663–676, Aug. 2006, doi:  
467 10.1016/J.CELL.2006.07.024.
- 468 8. K. Takahashi and S. Yamanaka, "Induced pluripotent stem cells in medicine and biology.," *Development*,  
469 vol. 140, no. 12, pp. 2457–61, Jun. 2013, doi: 10.1242/dev.092551.
- 470 9. D. C. Hay *et al.*, "Highly efficient differentiation of hESCs to functional hepatic endoderm requires ActivinA  
471 and Wnt3a signaling," *Proc. Natl. Acad. Sci. U. S. A.*, vol. 105, no. 34, p. 12301, 2008, doi:  
472 10.1073/PNAS.0806522105.
- 473 10. J. Shan *et al.*, "HHS Public Access," vol. 9, no. 8, pp. 514–520, 2014, doi:  
474 10.1038/nchembio.1270.Identification.
- 475 11. D. S. Varghese, T. T. Alawathugoda, and S. A. Ansari, "Fine Tuning of Hepatocyte Differentiation from  
476 Human Embryonic Stem Cells: Growth Factor vs. Small Molecule-Based Approaches.," *Stem Cells Int.*, vol.  
477 2019, p. 5968236, 2019, doi: 10.1155/2019/5968236.
- 478 12. P. Matz, W. Wruck, B. Fauler, D. Herebian, T. Mielke, and J. Adjaye, "Footprint-free human fetal foreskin  
479 derived iPSCs: A tool for modeling hepatogenesis associated gene regulatory networks," *Sci. Rep.*, vol. 7,  
480 no. 1, p. 6294, Dec. 2017, doi: 10.1038/s41598-017-06546-9.
- 481 13. H. Rashidi *et al.*, "3D human liver tissue from pluripotent stem cells displays stable phenotype in vitro and  
482 supports compromised liver function in vivo," *Arch. Toxicol.*, vol. 92, no. 10, pp. 3117–3129, Oct. 2018, doi:  
483 10.1007/s00204-018-2280-2.
- 484 14. M. Kapałczyńska *et al.*, "2D and 3D cell cultures - a comparison of different types of cancer cell cultures.,"  
485 *Arch. Med. Sci.*, vol. 14, no. 4, pp. 910–919, Jun. 2018, doi: 10.5114/aoms.2016.63743.
- 486 15. G. A. Brent, "Mechanisms of thyroid hormone action.," *J. Clin. Invest.*, vol. 122, no. 9, pp. 3035–43, Sep. 2012,  
487 doi: 10.1172/JCI60047.
- 488 16. M. Bohndorf, A. Ncube, L.-S. Spitzhorn, J. Enczmann, W. Wruck, and J. Adjaye, "Derivation and  
489 characterization of integration-free iPSC line ISRM-UM51 derived from SIX2-positive renal cells isolated  
490 from urine of an African male expressing the CYP2D6 \*4/\*17 variant which confers intermediate drug  
491 metabolizing activity," *Stem Cell Res.*, vol. 25, 2017, doi: 10.1016/j.scr.2017.10.004.
- 492 17. J. Jozefczuk, A. Prigione, L. Chavez, and J. Adjaye, "Comparative Analysis of Human Embryonic Stem Cell  
493 and Induced Pluripotent Stem Cell-Derived Hepatocyte-Like Cells Reveals Current Drawbacks and  
494 Possible Strategies for Improved Differentiation," *Stem Cells Dev.*, vol. 20, no. 7, pp. 1259–1275, Jul. 2011,  
495 doi: 10.1089/scd.2010.0361.
- 496 18. N. Graffmann *et al.*, "Modeling Nonalcoholic Fatty Liver Disease with Human Pluripotent Stem Cell-  
497 Derived Immature Hepatocyte-Like Cells Reveals Activation of PLIN2 and Confirms Regulatory Functions  
498 of Peroxisome Proliferator-Activated Receptor Alpha," *Stem Cells Dev.*, vol. 25, no. 15, 2016, doi:  
499 10.1089/scd.2015.0383.
- 500 19. R. C. Gentleman *et al.*, "Bioconductor: open software development for computational biology and  
501 bioinformatics.," *Genome Biol.*, vol. 5, no. 10, 2004, doi: 10.1186/gb-2004-5-10-r80.
- 502 20. B. S. Carvalho and R. A. Irizarry, "A framework for oligonucleotide microarray preprocessing,"  
503 *Bioinformatics*, vol. 26, no. 19, pp. 2363–2367, 2010, doi: 10.1093/bioinformatics/btq431.

- 504 21. H. Chen and P. C. Boutros, "VennDiagram: A package for the generation of highly-customizable Venn and  
505 Euler diagrams in R," *BMC Bioinformatics*, vol. 12, no. 1, p. 35, 2011, doi: 10.1186/1471-2105-12-35.
- 506 22. M. Kanehisa, M. Furumichi, M. Tanabe, Y. Sato, and K. Morishima, "KEGG: New perspectives on genomes,  
507 pathways, diseases and drugs," *Nucleic Acids Res.*, vol. 45, no. D1, pp. D353–D361, 2017, doi:  
508 10.1093/nar/gkw1092.
- 509 23. W. Luo and C. Brouwer, "Pathview: An R/Bioconductor package for pathway-based data integration and  
510 visualization," *Bioinformatics*, vol. 29, no. 14, pp. 1830–1831, 2013, doi: 10.1093/bioinformatics/btt285.
- 511 24. S. Falcon and R. Gentleman, "Using GOstats to test gene lists for GO term association," *Bioinformatics*, vol.  
512 23, no. 2, pp. 257–258, 2007, doi: 10.1093/bioinformatics/btl567.
- 513 25. L. Burri, G. H. Thoresen, and R. K. Berge, "The role of PPAR activation in liver and muscle," *PPAR Res.*,  
514 vol. 2010, 2010, doi: 10.1155/2010/542359.
- 515 26. A. Flores-Morales *et al.*, "Patterns of liver gene expression governed by TR $\beta$ ," *Mol. Endocrinol.*, vol. 16, no.  
516 6, pp. 1257–1268, 2002, doi: 10.1210/me.16.6.1257.
- 517 27. C. Lu and S.-Y. Cheng, "Thyroid hormone receptors regulate adipogenesis and carcinogenesis via crosstalk  
518 signaling with peroxisome proliferator-activated receptors," *J. Mol. Endocrinology*, vol. 44, no. 3, pp. 143–154,  
519 2010, [Online]. Available: <https://jme.bioscientifica.com/view/journals/jme/44/3/143.xml>.
- 520 28. G. Y. Rychkov and G. J. Barritt, "Expression and Function of TRP Channels in Liver Cells BT - Transient  
521 Receptor Potential Channels," M. S. Islam, Ed. Dordrecht: Springer Netherlands, 2011, pp. 667–686.
- 522 29. T. A. Potapova, V. N. Babenko, V. F. Kobzev, A. G. Romashchenko, V. N. Maksimov, and M. I. Voevoda,  
523 "Associations of Cold Receptor TRPM8 Gene Single Nucleotide Polymorphism with Blood Lipids and  
524 Anthropometric Parameters in Russian Population," *Bull. Exp. Biol. Med.*, vol. 157, no. 6, pp. 757–761, 2014,  
525 doi: 10.1007/s10517-014-2660-4.
- 526 30. M. Fortier *et al.*, "Hepatospecific ablation of p38 $\alpha$  MAPK governs liver regeneration through modulation  
527 of inflammatory response to CCl<sub>4</sub>-induced acute injury," *Sci. Rep.*, vol. 9, no. 1, pp. 1–12, 2019, doi:  
528 10.1038/s41598-019-51175-z.
- 529 31. A. M. Tormos *et al.*, "P38 $\alpha$  regulates actin cytoskeleton and cytokinesis in hepatocytes during development  
530 and aging," *PLoS One*, vol. 12, no. 2, pp. 1–22, 2017, doi: 10.1371/journal.pone.0171738.
- 531 32. M. Gordillo, T. Evans, and V. Gouon-Evans, "Orchestrating liver development," *Dev.*, vol. 142, no. 12, pp.  
532 2094–2108, 2015, doi: 10.1242/dev.114215.
- 533 33. I. A. Rowe, "Lessons from Epidemiology: The Burden of Liver Disease," *Dig. Dis.*, vol. 35, no. 4, pp. 304–  
534 309, 2017, doi: 10.1159/000456580.
- 535 34. R. Siller, S. Greenhough, E. Naumovska, and G. J. Sullivan, "Small-Molecule-Driven Hepatocyte  
536 Differentiation of Human Pluripotent Stem Cells," *Stem Cell Reports*, vol. 4, no. 5, pp. 939–952, May 2015,  
537 doi: 10.1016/j.stemcr.2015.04.001.
- 538 35. Y. Song, X. Yao, and H. Ying, "Thyroid hormone action in metabolic regulation.," *Protein Cell*, vol. 2, no. 5,  
539 pp. 358–68, May 2011, doi: 10.1007/s13238-011-1046-x.
- 540 36. R. MALIK and H. HODGSON, "The relationship between the thyroid gland and the liver," *QJM*, vol. 95,  
541 no. 9, pp. 559–569, Sep. 2002, doi: 10.1093/qjmed/95.9.559.
- 542 37. Y.-H. Huang, M.-M. Tsai, and K.-H. Lin, "Thyroid Hormone Dependent Regulation of Target Genes and  
543 Their Physiological Significance," 2008. Accessed: Apr. 26, 2019. [Online]. Available:  
544 <http://cgmj.cgu.edu.tw/3104/310401.pdf>.
- 545 38. R. Conti, C. Ceccarini, and M. F. Tecce, "Thyroid hormone effect on alpha-fetoprotein and albumin  
546 coordinate expression by a human hepatoma cell line.," *Biochim. Biophys. Acta*, vol. 1008, no. 3, pp. 315–21,  
547 Aug. 1989, Accessed: Aug. 31, 2018. [Online]. Available: <http://www.ncbi.nlm.nih.gov/pubmed/2474323>.
- 548 39. Ö. Tarım, "Thyroid hormones and growth in health and disease.," *J. Clin. Res. Pediatr. Endocrinol.*, vol. 3,  
549 no. 2, pp. 51–5, 2011, doi: 10.4274/jcrpe.v3i2.11.
- 550 40. A. Cvorovic *et al.*, "A thyroid hormone receptor/KLF9 axis in human hepatocytes and pluripotent stem cells.,"  
551 *Stem Cells*, vol. 33, no. 2, pp. 416–28, Feb. 2015, doi: 10.1002/stem.1875.
- 552
